# Supplementary material
Source: publisher site journal article supplement (https://www.spandidos-publications.com/4693/downloadSupplementary)
Supplement: Supplementary file 1 [file downloadSupplementary]

**Table SI.** Best response following third-line treatment in platinum-doublet group.

| Response                | CBDCA+VP-16<br>n=6 | CBDCA+PTX<br>n=9 |
|-------------------------|--------------------|------------------|
| Complete response       | 0                  | 0                |
| Partial response        | 0                  | 4                |
| Stable disease          | 4                  | 1                |
| Progressive disease     | 2                  | 4                |
| Response rate, %        | 0                  | 55.5             |
| Disease control rate, % | 66.7               | 44.4             |

CBDCA: carboplatin, VP-16: etoposide, PTX: paclitaxel.
